# Supplementary material for: Iron Replacement Therapy with Oral Ferric Maltol: Review of the Evidence and Expert Opinion
Source: MDPI journal article supplement (doi:10.3390/jcm10194448), 2021-09-28
Supplement: s1 [file s1]

**Schmidt et al. Iron Replacement Therapy With Oral Ferric Maltol: Review of the Evidence and Expert Opinion**

**Supplementary materials**

Figure S1. CONSORT flow diagram.

Table S1. Designs of ferric maltol clinical trials.

**Figure S1.** CONSORT flow diagram.

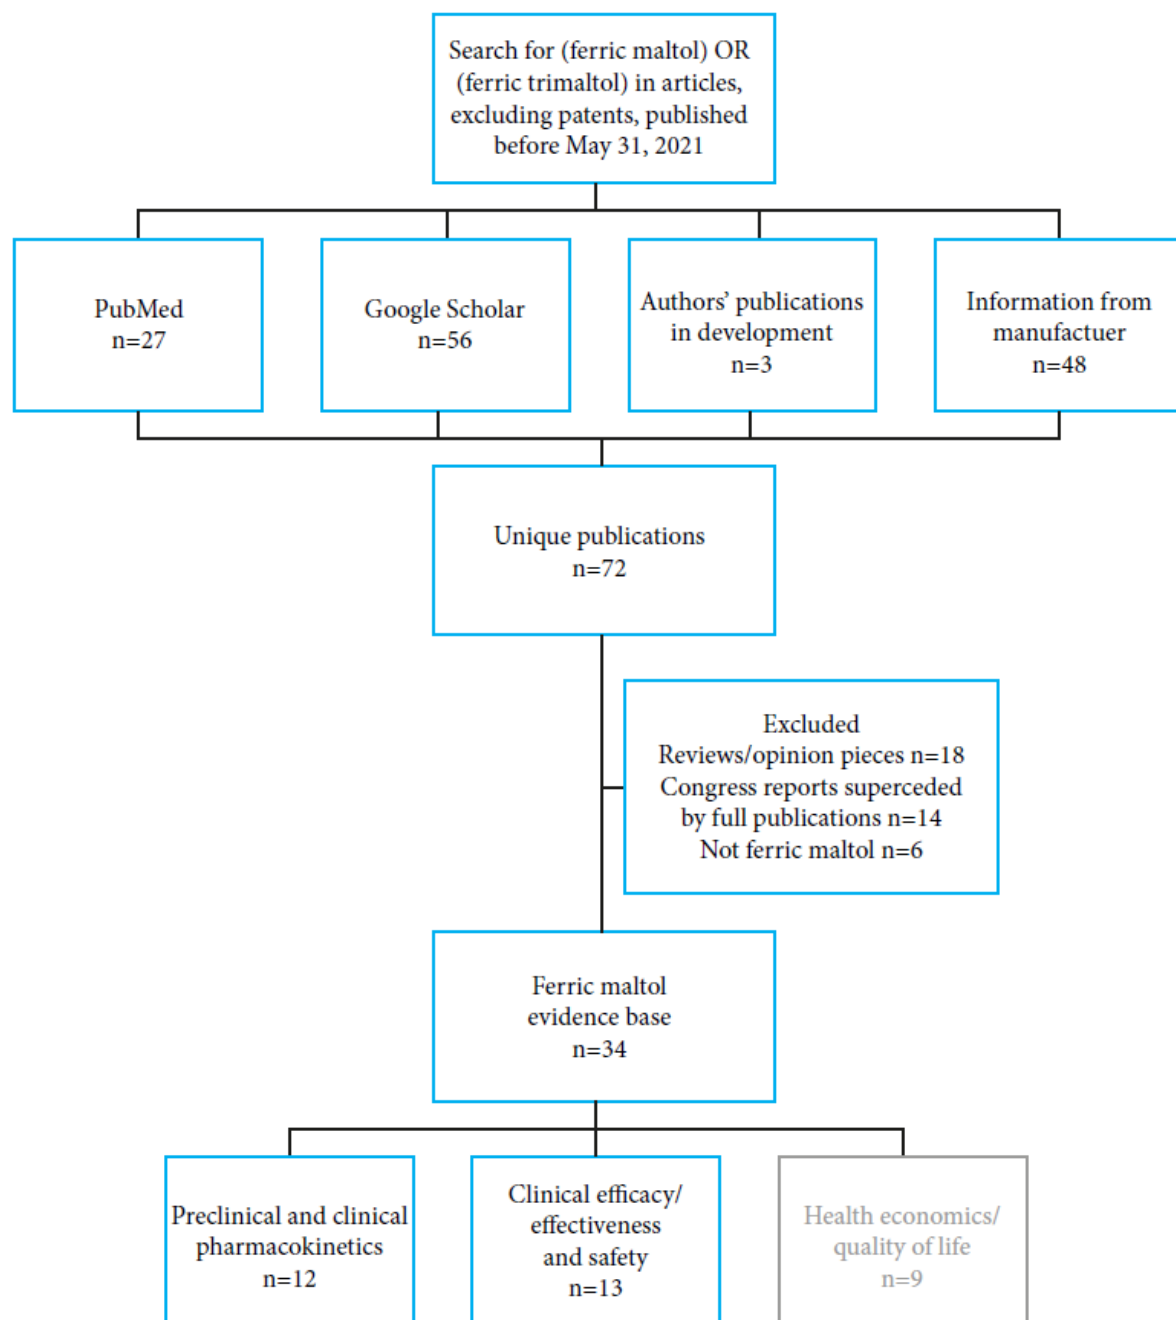

**Table S1.** Designs of ferric maltol clinical trials.

| Study               | Reference                  | Location | Anemia and iron deficiency definitions                                 | Underlying condition                                                                                                                                                                                                                                                                                                                                                              | Population                       | Patients, N | Design                      | Comparator | Ferric maltol dosage            | Treatment duration | Primary endpoint     |
|---------------------|----------------------------|----------|------------------------------------------------------------------------|-----------------------------------------------------------------------------------------------------------------------------------------------------------------------------------------------------------------------------------------------------------------------------------------------------------------------------------------------------------------------------------|----------------------------------|-------------|-----------------------------|------------|---------------------------------|--------------------|----------------------|
| Proof of concept    | Harvey et al., 1998 [1]    | UK       | Hb <13 g/dL (men) or <12 g/dL (women)<br><br>Serum ferritin <15 µg/L   | Gastroenterologic conditions, without active inflammation (CD n=13, UC n=2, partial gastrectomy n=2, cecal angiodysplasia n=1, and idiopathic iron-deficiency anemia following upper and lower gastrointestinal endoscopy and duodenal biopsy n=5; disease severity not specified)<br><br>Documented intolerance to 200 mg ferrous sulphate and refusal to try ferrous iron again | Not specified (presumably adult) | 23          | Single arm, OL, exploratory | NA         | 30 mg twice daily               | 12 weeks           | Correction of anemia |
| Phase I IBD (adult) | Bokemeyer et al., 2017 [2] | Germany  | Hb >8.5 g/dL<br><br>Ferritin <30 µg/L or ferritin <50 µg/L + TSAT <20% | IBD (CD n=13, UC n=11; disease severity not specified)                                                                                                                                                                                                                                                                                                                            | Adult                            | 24          | Randomized                  | NA         | 30, 60, or 90 mg twice daily    | 8 days             | PK, iron uptake      |
| Phase I (pediatric) | Allen et al., 2021 [3]     | UK       | Ferritin <30 µg/L or ferritin <50 µg/L + TSAT <20%                     | Eligibility criteria: Iron deficiency of any cause<br><br>At baseline: CD (n=8)                                                                                                                                                                                                                                                                                                   | Pediatric                        | 37          | Randomized                  | NA         | 7.8, 16.6, or 30 mg twice daily | 10 days            | PK, iron uptake      |

|                           |                          |        |                                                                                                                                          |                                                                                                                                                                                                                                                                                                                                                                          |       |                                                                  |                                 |               |                   |                                                                    |                                                                         |
|---------------------------|--------------------------|--------|------------------------------------------------------------------------------------------------------------------------------------------|--------------------------------------------------------------------------------------------------------------------------------------------------------------------------------------------------------------------------------------------------------------------------------------------------------------------------------------------------------------------------|-------|------------------------------------------------------------------|---------------------------------|---------------|-------------------|--------------------------------------------------------------------|-------------------------------------------------------------------------|
|                           |                          |        |                                                                                                                                          | Other gastrointestinal disorders (n=11)<br>Vitamin D deficiency (n=7)<br>CKD (n=4)<br>Other conditions (n=7)                                                                                                                                                                                                                                                             |       |                                                                  |                                 |               |                   |                                                                    |                                                                         |
| Phase III IBD (AEGIS 1/2) | Gasche et al., 2015 [4]  | Global | Hb $\geq 9.5$ to $<12.0$ g/dL (women) or $<13.0$ g/dL (men)                                                                              | Eligibility criteria: Quiescent or mild or moderate IBD<br>UC: SCCAI score $<4$ at screening and randomization<br>CD: CDAI score $<220$ at randomization<br><br>At baseline:<br>UC: FM n=29; placebo n=29<br>Median (range) SCCAI score: FM 2.0 (0–3); placebo 2.0 (0–3)<br>CD: FM n=35; placebo n=35<br>Median (range) CDAI score: FM 75 (14–199); placebo 108 (10–220) | Adult | 128 (FM n=64; placebo n=64)                                      | Randomized, DB                  | Placebo       | 30 mg twice daily | 12 weeks                                                           | Change in Hb to week 12                                                 |
| AEGIS 1/2 OL extension    | Schmidt et al., 2016 [5] |        | Serum ferritin $<30$ $\mu\text{g/L}$ at screening                                                                                        |                                                                                                                                                                                                                                                                                                                                                                          |       | 97 entered OL phase (from DB FM n=50, from DB placebo n=47)      | OL extension                    | NA            |                   | Up to 52 weeks, following completion of 12-week double-blind phase | Change in Hb from baseline                                              |
| Phase IIIB IBD (H2H)      | Howaldt et al., 2021 [6] | Global | Hb 8.0 to $\leq 11.0/\leq 12.0$ g/dL (women/men)<br><br>Ferritin $<30$ $\mu\text{g/L}$ or ferritin $<100$ $\mu\text{g/L}$ + TSAT $<20\%$ | Eligibility criteria: Quiescent or mild/moderate IBD<br>UC: SCCAI score $\leq 5$ during screening<br>CD: CDAI score $\leq 300$ during screening<br><br>At baseline:<br>UC: FM n=46, IV FCM n=46                                                                                                                                                                          | Adult | 250<br><br>ITT: FM n=125, FCM n=125<br><br>PP: FM n=78; FCM n=88 | Randomized, OL, non-inferiority | IV iron (FCM) | 30 mg twice daily | 12 weeks (primary endpoint), some patients treated up to 52 weeks  | Hb responder rate ( $\geq 2$ g/dL increase or normalization) at week 12 |

|                                                       |                                 |         |                                                                                                                                 |                                                                                                                                                                                                                                                                                                                |       |                                                                                                    |                                                                   |                   |                         |                                                                                                     |                         |
|-------------------------------------------------------|---------------------------------|---------|---------------------------------------------------------------------------------------------------------------------------------|----------------------------------------------------------------------------------------------------------------------------------------------------------------------------------------------------------------------------------------------------------------------------------------------------------------|-------|----------------------------------------------------------------------------------------------------|-------------------------------------------------------------------|-------------------|-------------------------|-----------------------------------------------------------------------------------------------------|-------------------------|
|                                                       |                                 |         |                                                                                                                                 | Mean (SD)<br>SCCAI score: FM<br>2.2 (1.8); IV FCM<br>2.3 (1.6)<br><br>CD:<br>FM n=79, IV<br>FCM n=79<br>Mean (SD) CDAI<br>score: FM 129.6<br>(60.1); IV FCM<br>140.5 (75.8)                                                                                                                                    |       |                                                                                                    |                                                                   |                   |                         |                                                                                                     |                         |
| Phase III CKD<br>(AEGIS-CKD)                          | Pergola &<br>Kopyt, 2021<br>[7] | USA     | Hb ≥8.0 and<br><11.0 g/dL<br><br>Ferritin<br><250 µg/L +<br>TSAT <25%<br>or<br>ferritin <500<br>µg/L + TSAT<br><15%             | Eligibility criteria:<br>CKD stage III or<br>IV (eGFR ≥15 to<br><60 mL/min/1.73<br>m², not on<br>dialysis)<br><br>At baseline:<br>Mean (SD)<br>eGFR:<br>FM 31.9 (11.5)<br>mL/min/1.73 m²<br>Placebo 29.7<br>(10.6)<br>mL/min/1.73 m²                                                                           | Adult | 167<br><br>FM n=111<br>Placebo<br>n=56<br><br>125<br>started<br>open-label<br>FM after<br>16 weeks | Randomized,<br>DB (16<br>weeks)<br><br>OL extension<br>(36 weeks) | Placebo<br><br>NA | 30 mg<br>twice<br>daily | 16 weeks<br>(primary<br>endpoint) +<br>up to 36<br>weeks (open<br>label) (max<br>total 52<br>weeks) | Hb change at<br>week 16 |
| Phase IIIB<br>pulmonary<br>hypertension<br>(ORION-PH) | Olsson et<br>al., 2020 [8]      | Germany | Hb ≥7 to <12<br>g/dL (women)<br>or ≥8 to <13<br>g/dL (men)<br><br>Serum ferritin<br><100 µg/L or<br>100–300 µg/L<br>+ TSAT <20% | Eligibility criteria:<br>any form of PH<br>with mean resting<br>pulmonary artery<br>pressure ≥25<br>mmHg<br><br>At baseline:<br>PAH (n=14)<br>PH due to<br>left heart disease<br>(n=1)<br>Inoperable<br>chronic<br>thromboembolic<br>PH (n=7)<br><br>Mean (SD)<br>pulmonary artery<br>pressure 50 (11)<br>mmHg | Adult | 22                                                                                                 | Single-arm,<br>OL                                                 | NA                | 30 mg<br>twice<br>daily | 12 weeks                                                                                            | Hb change at<br>week 12 |

|                  |                           |    |                                                                                         |                                                        |       |                                   |     |    |                   |                                                |                  |
|------------------|---------------------------|----|-----------------------------------------------------------------------------------------|--------------------------------------------------------|-------|-----------------------------------|-----|----|-------------------|------------------------------------------------|------------------|
| RWE IBD (FRESH)  | Cummings et al., 2021 [9] | UK | Hb 9.5–12 g/dL (women) or 9.5–13 g/dL (men)<br><br>Serum ferritin <30 µg/L or TSAT <20% | Inactive IBD (CD n=28, UC n=28, unclassified IBD n=3)  | Adult | 59 (30 with primary outcome data) | RWE | NA | 30 mg twice daily | 12 weeks (window allowed up to 16 weeks)       | Hb normalization |
| RWE IBD (London) | Oppong et al., 2018 [10]  | UK | Not specified but presumably in line with licence                                       | IBD (CD n=12, UC n=16; disease severity not specified) | Adult | 28                                | RWE | NA | 30 mg twice daily | Patients contacted ≥1 month after prescription | Tolerability     |

CD, Crohn's disease; CDAI, Crohn's Disease Activity Index; CKD, chronic kidney disease; DB, double-blind; eGFR, estimated glomerular filtration rate; FCM, ferric carboxymaltose; FM, ferric maltol; H2H, head-to-head; Hb, hemoglobin; IBD, inflammatory bowel disease; ITT, intention-to-treat; IV, intravenous; NA, not applicable; OL, open-label; PAH, pulmonary arterial hypertension; PH, pulmonary hypertension; PK, pharmacokinetics; PP, per protocol; RWE, real-world evidence; SCCAI, Simple Clinical Colitis Activity Index; SD, standard deviation; TSAT, transferrin saturation; UC, ulcerative colitis.

## References

1. Harvey, R.; Reffitt, D.; Doig, L.; Meenan, J.; Ellis, R.; Thompson, R.; Powell, J. Ferric trimaltol corrects iron deficiency anaemia in patients intolerant of iron. *Aliment Pharmacol Ther* **1998**, *12*, 845-848, doi:10.1046/j.1365-2036.1998.00380.x.
2. Bokemeyer, B.; Krummenerl, A.; Maaser, C.; Howaldt, S.; Mroß, M.; Mallard, N. Randomized open-label phase 1 study of the pharmacokinetics of ferric maltol in inflammatory bowel disease patients with iron deficiency. *Eur J Drug Metab Pharmacokinet* **2017**, *42*, 229-238, doi:10.1007/s13318-016-0334-5.
3. Allen, S.; Auth, M.K.-H.; Kim, J.J.; Vadamalayan, B. Safety, tolerability and pharmacokinetics of oral ferric maltol in children with iron deficiency: Phase 1 study. *JPGN Rep* **2021**, *2*, e090, doi:10.1097/PG9.0000000000000090.
4. Gasche, C.; Ahmad, T.; Tulassay, Z.; Baumgart, D.C.; Bokemeyer, B.; Büning, C.; Howaldt, S.; Stallmach, A. Ferric maltol is effective in correcting iron deficiency anemia in patients with inflammatory bowel disease: Results from a phase-3 clinical trial program. *Inflamm Bowel Dis* **2015**, *21*, 579-588, doi:10.1097/MIB.0000000000000314.
5. Schmidt, C.; Ahmad, T.; Tulassay, Z.; Baumgart, D.; Bokemeyer, B.; Howaldt, S.; Stallmach, A.; Büning, C.; Group, A.S.; Baumgart, D.C. Ferric maltol therapy for iron deficiency anaemia in patients with inflammatory bowel disease: Long-term extension data from a Phase 3 study. *Aliment Pharmacol Ther* **2016**, *44*, 259-270, doi:10.1111/apt.13665.

6. Howaldt, S.; Domènech, E.; Martinez, N.; Schmidt, C.; Bokemeyer, B. Long-term effectiveness of oral ferric maltol versus intravenous ferric carboxymaltose for the treatment of iron-deficiency anemia in patients with inflammatory bowel disease: A randomized controlled noninferiority trial. *Inflamm Bowel Dis* **2021**, May 14, 2021 (epub ahead of print), doi:10.1093/ibd/izab073.
7. Pergola, P.E.; Kopyt, N.P. Oral ferric maltol for the treatment of iron-deficiency anemia in patients with chronic kidney disease: Phase 3, multicenter, randomized, placebo-controlled trial and open-label extension. *Am J Kidney Dis* **2021**, May 21, 2021 (epub ahead of print), doi:10.1053/j.ajkd.2021.03.020.
8. Olsson, K.M.; Fuge, J.; Brod, T.; Kamp, J.C.; Schmitto, J.; Kempf, T.; Bauersachs, J.; Hoeper, M.M. Oral iron supplementation with ferric maltol in patients with pulmonary hypertension. *Eur Respir J* **2020**, *56*, 2000616, doi:10.1183/13993003.00616-2020.
9. Cummings, J.F.; Fraser, A.; Stansfield, C.; Beales, I.; Sebastian, S.; Hoque, S. Ferric maltol Real-world Effectiveness Study in Hospital practice (FRESH): Clinical characteristics and outcomes of patients with inflammatory bowel disease receiving ferric maltol for iron-deficiency anaemia in the UK. *BMJ Open Gastroenterol* **2021**, *8*, e000530, doi:10.1136/bmjgast-2020-000530.
10. Oppong, P.; Lovato, S.; Akbar, A. PTU-124 Real world tolerability & efficacy of oral ferric maltol (feraccru) in IBD associated anaemia. *Gut* **2018**, *67*, A252-A253, doi:10.1136/gutjnl-2018-BSGAbstracts.502.
